# Supplementary material for: Preventive Measures for SARS-CoV-2 in the Workplace and Vaccine Acceptance: Assessment of Knowledge, Attitudes and Behaviors of Workers in Southern Italy
Source: MDPI journal article supplement (doi:10.3390/vaccines10111872), 2022-11-05
Supplement: s1 [file s1]

## Variables included in the logistic regression models with related categories

### Model 1. Knowledge of SARS-CoV-2 routes of transmission and preventive measures

| Independent variables                                                                 | Code                                     |
|---------------------------------------------------------------------------------------|------------------------------------------|
| Age                                                                                   | Years (continuos)                        |
| Gender                                                                                | Male = 0<br>Female = 1                   |
| Sons/daughters                                                                        | None = 0<br>≥1 = 1                       |
| Number of cohabitants                                                                 | None = 0<br>≥1 = 1                       |
| Education level                                                                       | Other = 0<br>University degree = 1       |
| Employment type                                                                       | Other = 0<br>Manager/Office employee = 1 |
| Working from home during pandemic                                                     | No = 0<br>Yes = 1                        |
| Years of working activity                                                             | Years (continuos)                        |
| Having been infected with SARS-CoV-2                                                  | No = 0<br>Yes = 1                        |
| Having had cohabitants infected with SARS-CoV-2                                       | No = 0<br>Yes = 1                        |
| Self-rated health status                                                              | Low (1-7) = 0<br>High (8-10) = 1         |
| Having received information about COVID-19 prevention in the workplace from companies | No = 0<br>Yes = 1                        |
| Need for further information on COVID-19 prevention or COVID-19 vaccine               | No = 0<br>Yes = 1                        |

### Model 2. High concern of contracting and transmitting SARS-CoV-2 to family

| Independent variables                                                                 | Code                                     |
|---------------------------------------------------------------------------------------|------------------------------------------|
| Age                                                                                   | Years (continuos)                        |
| Gender                                                                                | Male = 0<br>Female = 1                   |
| Sons/daughters                                                                        | None = 0<br>≥1 = 1                       |
| Number of cohabitants                                                                 | None = 0<br>≥1 = 1                       |
| Education level                                                                       | Other = 0<br>University degree = 1       |
| Employment type                                                                       | Other = 0<br>Manager/Office employee = 1 |
| Working from home during pandemic                                                     | No = 0<br>Yes = 1                        |
| Years of working activity                                                             | Years (continuos)                        |
| Having had cohabitants infected with SARS-CoV-2                                       | No = 0<br>Yes = 1                        |
| Self-rated health status                                                              | Low (1-7) = 0<br>High (8-10) = 1         |
| Having received information about COVID-19 prevention in the workplace from companies | No = 0<br>Yes = 1                        |
| Need for further information on COVID-19 prevention or COVID-19 vaccine               | No = 0<br>Yes = 1                        |
| Knowledge of all SARS-CoV-2 modes of transmission and main preventive measures        | No = 0<br>Yes = 1                        |
| Knowing main COVID-19 symptoms                                                        | Others = 0<br>Fever/Cough/Tiredness = 1  |

### Model 3. Adherence to all preventive measures in the workplace

| Independent variables                                                                    | Code                                     |
|------------------------------------------------------------------------------------------|------------------------------------------|
| Age                                                                                      | Years (continuos)                        |
| Gender                                                                                   | Male = 0<br>Female = 1                   |
| Sons/daughters                                                                           | None = 0<br>≥1 = 1                       |
| Number of cohabitants                                                                    | None = 0<br>≥1 = 1                       |
| Education level                                                                          | Other = 0<br>University degree = 1       |
| Employment type                                                                          | Other = 0<br>Manager/Office employee = 1 |
| Working from home during pandemic                                                        | No = 0<br>Yes = 1                        |
| Years of working activity                                                                | Years (continuos)                        |
| Having had cohabitants infected with SARS-CoV-2                                          | No = 0<br>Yes = 1                        |
| Self-rated health status                                                                 | Low (1-7) = 0<br>High (8-10) = 1         |
| Having received information about COVID-19 prevention in the workplace from companies    | No = 0<br>Yes = 1                        |
| Need for further information on COVID-19 prevention or COVID-19 vaccine                  | No = 0<br>Yes = 1                        |
| Knowledge of all SARS-CoV-2 routes of transmission and main preventive measures          | No = 0<br>Yes = 1                        |
| Knowing main COVID-19 symptoms                                                           | Others = 0<br>Fever/Cough/Tiredness = 1  |
| Belief that the COVID-19 vaccine is highly useful and safe                               | No = 0<br>Yes = 1                        |
| Belief that use of masks in the workplace reduces risk of SARS-CoV-2 transmission        | Uncertain/Disagree = 0<br>Agree = 1      |
| Belief that physical distancing in the workplace reduces risk of SARS-CoV-2 transmission | Uncertain/Disagree = 0<br>Agree = 1      |
| Belief that the COVID-19 vaccine also protects family from contagion                     | Uncertain/Disagree = 0<br>Agree = 1      |
| Belief that the vaccine offers high protection against COVID-19                          | Uncertain/Disagree = 0<br>Agree = 1      |
| Being highly concerned of contracting and transmitting SARS-CoV-2 to family              | No = 0<br>Yes = 1                        |

### Model 4. Unwillingness to get vaccinated for COVID-19 because the vaccination was considered not useful and/or safe and/or effective

| Independent variables             | Code                                     |
|-----------------------------------|------------------------------------------|
| Age                               | Years (continuos)                        |
| Gender                            | Male = 0<br>Female = 1                   |
| Sons/daughters                    | None = 0<br>≥1 = 1                       |
| Number of cohabitants             | None = 0<br>≥1 = 1                       |
| Education level                   | Other = 0<br>University degree = 1       |
| Employment type                   | Other = 0<br>Manager/Office employee = 1 |
| Working from home during pandemic | No = 0<br>Yes = 1                        |
| Years of working activity         | Years (continuos)                        |

|                                                                                          |                                         |
|------------------------------------------------------------------------------------------|-----------------------------------------|
| Having had cohabitants infected with SARS-CoV-2                                          | No = 0<br>Yes = 1                       |
| Self-rated health status                                                                 | Low (1-7) = 0<br>High (8-10) = 1        |
| Having received information about COVID-19 prevention in the workplace from companies    | No = 0<br>Yes = 1                       |
| Need for further information on COVID-19 prevention or COVID-19 vaccine                  | No = 0<br>Yes = 1                       |
| Knowledge of all SARS-CoV-2 routes of transmission and main preventive measures          | No = 0<br>Yes = 1                       |
| Knowing main COVID-19 symptoms                                                           | Others = 0<br>Fever/Cough/Tiredness = 1 |
| Belief that the COVID-19 vaccine is highly useful and safe                               | Low (1-7) = 0<br>High (8-10) = 1        |
| Belief that use of masks in the workplace reduces risk of SARS-CoV-2 transmission        | Uncertain/Disagree = 0<br>Agree = 1     |
| Belief that physical distancing in the workplace reduces risk of SARS-CoV-2 transmission | Uncertain/Disagree = 0<br>Agree = 1     |
| Belief that the COVID-19 vaccine also protects family from contagion                     | Uncertain/Disagree = 0<br>Agree = 1     |
| Belief that the vaccine offers high protection against COVID-19                          | Uncertain/Disagree = 0<br>Agree = 1     |
| Being highly concerned of contracting and transmitting SARS-CoV-2 to family              | No = 0<br>Yes = 1                       |
